# Supplementary material for: Proteomic and Transcriptomic Responses Enable Clams to Correct the pH of Calcifying Fluids and Sustain Biomineralization in Acidified Environments
Source: MDPI journal article supplement (doi:10.3390/ijms232416066), 2022-12-16
Supplement: s1 [file s1]

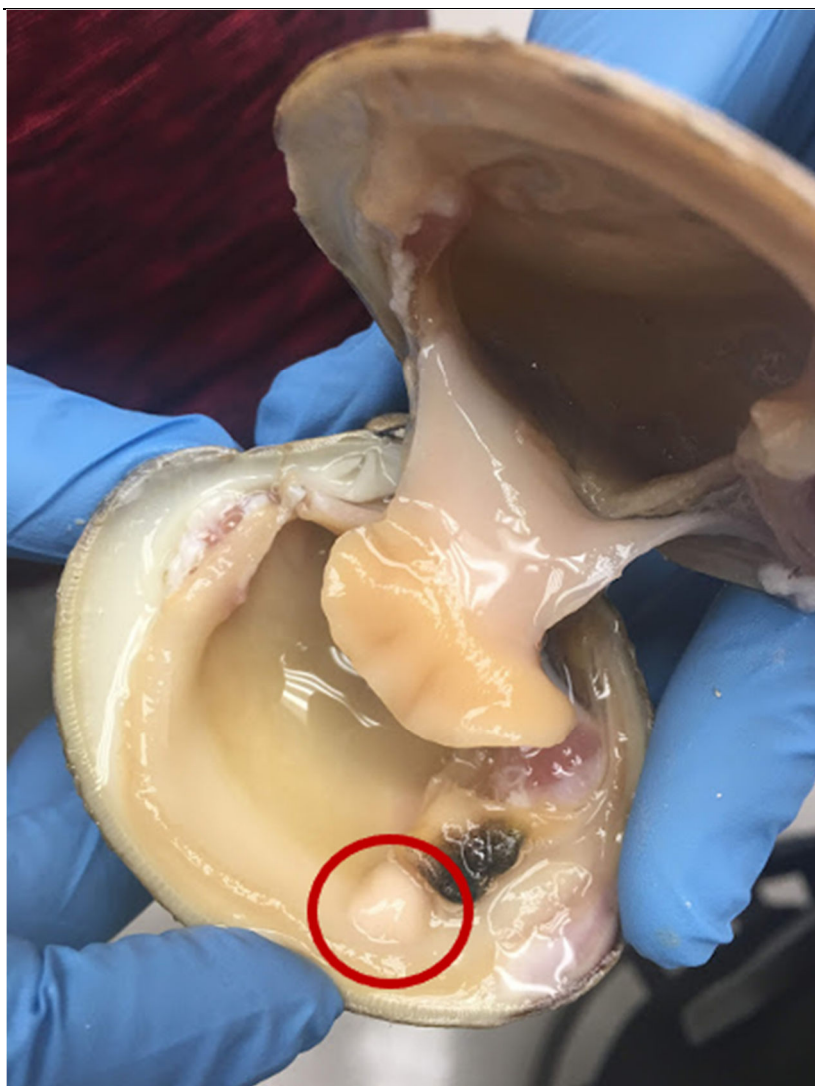

**Figure S1.** Suspicious nodule detected in the mantle of *M. mercenaria* maintained in high  $p\text{CO}_2$  conditions. Nodules are often associated with infection by *Mucochytrium quahogii* although this clam was negative for the parasite.

**Table S1.** DEGs in hemocytes from EPF collected from clams in OA vs clams in control conditions. Expression level corresponds to the OA treatment.

| Gene ID                   | Predicted Protein                  | L2FC  | Adj p-value |
|---------------------------|------------------------------------|-------|-------------|
| mRNA.chromosome_2.1379.1  | protocadherin Fat 1/2/3            | -8.43 | 4.0E-06     |
| mRNA.chromosome_17.1242.1 | Integrase catalytic domain profile | -6.22 | 4.7E-07     |
| mRNA.chromosome_12.417.1  | cathepsin L                        | -5.93 | 1.0E-04     |
| mRNA.chromosome_9.119.1   | protocadherin Fat 1/2/3            | -5.16 | 1.0E-03     |
| mRNA.chromosome_8.169.3   | golgin subfamily B member 1        | -4.97 | 1.0E-03     |

|                           |                                                                      |       |         |
|---------------------------|----------------------------------------------------------------------|-------|---------|
| mRNA.contig_845.1.1       | pol-like protein                                                     | -4.25 | 2.7E-02 |
| mRNA.contig_1983.1.1      | TNF family profile                                                   | -4.08 | 5.1E-02 |
| mRNA.chromosome_16.1283.1 | Integrase catalytic domain profile.                                  | -3.94 | 3.8E-02 |
| mRNA.chromosome_8.1919.2  | scavenger receptor cysteine-rich type 1 protein M160-like isoform X2 | -3.46 | 7.4E-03 |
| mRNA.chromosome_2.418.1   | Thrombospondin type-1 (TSP1) repeat profile                          | -3.29 | 7.4E-03 |
| mRNA.chromosome_11.1914.1 | tubulin alpha                                                        | -3.15 | 3.9E-02 |
| mRNA.chromosome_10.859.1  | zinc finger protein 862-like isoform X1                              | -3.08 | 7.4E-03 |
| mRNA.chromosome_4.2461.1  | unnamed protein product                                              | -2.24 | 7.4E-03 |
| mRNA.chromosome_17.196.2  | bile salt-activated lipase-like                                      | 2.16  | 2.8E-03 |
| mRNA.chromosome_2.915.1   | neuroligin                                                           | 2.19  | 3.4E-06 |
| mRNA.chromosome_17.1090.1 | cytochrome P450 2B4-like                                             | 2.19  | 2.7E-02 |
| mRNA.chromosome_11.1022.3 | ATP-binding cassette, subfamily B                                    | 2.24  | 3.8E-02 |
| mRNA.chromosome_7.1826.1  | phospholipid-translocating ATPase                                    | 2.82  | 1.3E-02 |
| mRNA.contig_573.4.1       | --                                                                   | 2.87  | 3.7E-02 |
| mRNA.chromosome_13.1522.1 | fatty acid synthase, animal type                                     | 2.90  | 2.2E-02 |
| mRNA.chromosome_16.500.1  | Acyl-CoA dehydrogenase, middle domain                                | 3.08  | 5.4E-02 |
| mRNA.chromosome_7.2111.1  | solute carrier family 25                                             | 3.65  | 4.0E-04 |
| mRNA.chromosome_5.470.1   | small subunit ribosomal protein S5                                   | 3.82  | 4.1E-02 |
| mRNA.chromosome_12.413.4  | solute carrier family 6                                              | 4.37  | 4.3E-02 |
| mRNA.chromosome_18.1048.1 | myosin-3-like                                                        | 4.82  | 2.1E-02 |
| mRNA.chromosome_4.1870.1  | Brinker DNA-binding domain                                           | 4.97  | 4.1E-02 |
| mRNA.chromosome_15.405.1  | folylpolyglutamate synthase, mitochondrial isoform X1                | 5.15  | 1.8E-03 |
| mRNA.contig_3725.2.1      | RNA-directed DNA polymerase from transposon BS                       | 5.85  | 2.1E-02 |
| mRNA.chromosome_18.1047.1 | myosin-3-like                                                        | 5.96  | 1.0E-03 |
| mRNA.chromosome_3.951.1   | interferon-induced helicase C domain-containing protein 1            | 5.98  | 2.1E-02 |
| mRNA.chromosome_16.1831.1 | --                                                                   | 6.30  | 3.1E-02 |
| mRNA.chromosome_17.2204.1 | -- theromacin                                                        | 9.18  | 1.4E-02 |

|                           |               |      |         |
|---------------------------|---------------|------|---------|
| mRNA.chromosome_17.2202.1 | -- theromacin | 9.45 | 2.7E-02 |
|---------------------------|---------------|------|---------|

**Table S2.** DEGs in hemocytes from hemolymph collected from clams in OA vs clams in control conditions. Expression level corresponds to the OA treatment.

| Gene ID                   | Predicted Protein                                      | L2FC  | Adj p value |
|---------------------------|--------------------------------------------------------|-------|-------------|
| mRNA.chromosome_2.1379.1  | protocadherin Fat 1/2/3                                | -8.20 | 0.00        |
| mRNA.chromosome_9.119.1   | protocadherin Fat 1/2/3                                | -5.92 | 0.00        |
| mRNA.chromosome_3.570.1   | glutamate receptor ionotropic, NMDA 2A                 | -5.55 | 0.04        |
| mRNA.chromosome_19.1763.2 | Membrane alanyl dipeptidase (M1) family signature      | -5.49 | 0.05        |
| mRNA.chromosome_11.788.1  | glutamate receptor ionotropic, NMDA 2A                 | -5.23 | 0.04        |
| mRNA.chromosome_17.1242.1 | Integrase catalytic domain profile                     | -5.00 | 0.00        |
| mRNA.chromosome_16.1283.1 | Integrase catalytic domain profile.                    | -4.54 | 0.00        |
| mRNA.chromosome_17.1557.1 | Sulfotransferase domain                                | 2.09  | 0.03        |
| mRNA.chromosome_7.1244.1  | Cytochrome P450                                        | 2.12  | 0.01        |
| mRNA.chromosome_2.915.1   | neuroligin;                                            | 2.19  | 0.00        |
| mRNA.chromosome_18.134.1  | Pol                                                    | 2.97  | 0.05        |
| mRNA.chromosome_4.2319.1  | cytochrome P450, family 4, subfamily B, polypeptide 1  | 3.21  | 0.03        |
| mRNA.chromosome_13.2224.1 | prostaglandin-H2 D-isomerase / glutathione transferase | 4.54  | 0.05        |
| mRNA.chromosome_18.1048.1 | myosin-3-like                                          | 6.11  | 0.02        |
| mRNA.chromosome_18.1047.1 | myosin-3-like                                          | 6.57  | 0.00        |
| mRNA.chromosome_17.2204.1 | theromacin                                             | 12.98 | 0.00        |
| mRNA.chromosome_17.2202.1 | theromacin                                             | 14.17 | 0.00        |

**Table S3.** Excel file. Gene co-expression network analysis of hemocytes from EPF identified six modules of co-expressed genes

**Table S4.** Excel file. Gene co-expression network analysis of hemocytes from hemolymph identified six modules of co-expressed genes

**Table S5.** Excel file. Differentially expressed proteins of cell-free EPF from clams in OA vs clams in control conditions. Expression level corresponds to the OA treatment.

**Table S6.** Excel file. Differentially expressed proteins of plasma (cell-free hemolymph) from clams in OA vs clams in control conditions. Expression level corresponds to the OA treatment.

**Table S7.** Seawater chemistry (*mean*  $\pm$  SD)

|                                               | Control              | Acidified            |
|-----------------------------------------------|----------------------|----------------------|
| <b>pH<sub>r</sub></b>                         | 8.01 $\pm$ 0.24      | 7.27 $\pm$ 0.06      |
| <b>Temperature (°C)</b>                       | 25.5 $\pm$ 0.53      | 25.5 $\pm$ 0.53      |
| <b>Salinity PSU</b>                           | 30 $\pm$ 0           | 29.63 $\pm$ 1.06     |
| <b>pCO<sub>2</sub> ppm</b>                    | 626.19 $\pm$ 190.27  | 2732.56 $\pm$ 338.74 |
| <b><math>\Omega_{\text{aragonite}}</math></b> | 2.19 $\pm$ 0.24      | 0.69 $\pm$ 0.15      |
| <b><math>\Omega_{\text{calcite}}</math></b>   | 3.23 $\pm$ 0.49      | 0.99 $\pm$ 0.15      |
| <b>DIC</b>                                    | 2061.69 $\pm$ 104.40 | 2313.06 $\pm$ 242.12 |
| <b>CO<sub>3</sub></b>                         | 133.59 $\pm$ 20.25   | 38.52 $\pm$ 4.44     |
| <b>Total Alkalinity</b>                       | 1988.57 $\pm$ 725.60 | 2283.97 $\pm$ 217.18 |

**Table S8.** Primers used for the QPX qPCR assay (produced by Integrated DNA Technologies, Coralville, Iowa)

| Amount    | Forward                                       | Reverse                                        |
|-----------|-----------------------------------------------|------------------------------------------------|
| 2 $\mu$ M | Forward = 5.8S24For = 5'-TTTAGCGATGGATGTCT-3' | Reverse = QPXITS2-R2 = 5'-GCCCACAACTGCTCTWT-3' |
